# Supplementary material for: Chemically Induced Photoswitching of Fluorescent Probes—A General Concept for Super-Resolution Microscopy
Source: MDPI journal article supplement (doi:10.3390/molecules16043106), 2011-04-13

## Supplemental Information

Additional super-resolution images recorded with the PALM technique of actin-psCFP2 (Supporting Figure 1) are shown.

**Supporting Figure 1.** PALM images of actin-psCFP2 recorded in (A) PBS, (B) PBS with 10 mM MEA, (C) PBS with 100 mM MEA and (D) PBS with 100 mM MEA and oxygen removed.

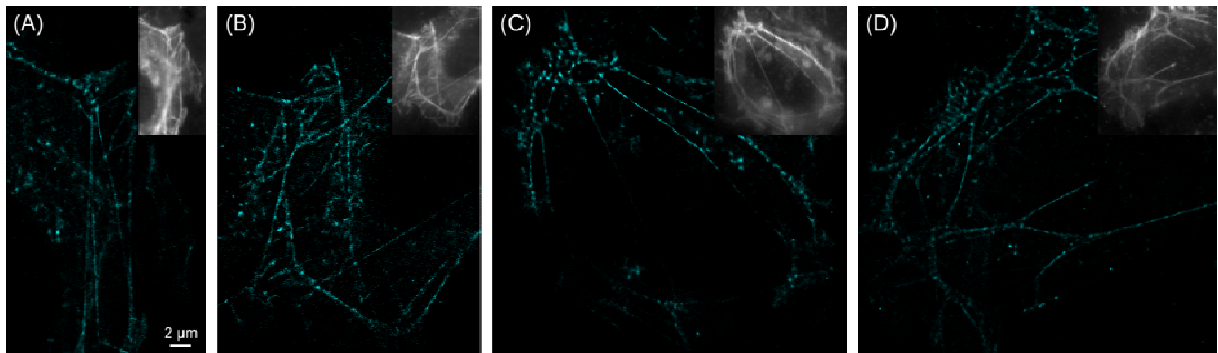

Supplement: s1 [file s1]
